# Supplementary material
Source: MDPI journal article supplement (https://www.mdpi.com/search?q=molbank-2023-M1548)
Supplement: s002 [file molbank-2023-M1548-s002.mol]

structure od title compounds.mol
  ChemDraw12202210342D

 35 39  0  0  0  0  0  0  0  0999 V2000
   -3.8433   -0.4995    0.0000 C   0  0  0  0  0  0  0  0  0  0  0  0
   -3.8433   -1.3245    0.0000 C   0  0  0  0  0  0  0  0  0  0  0  0
   -3.1288   -1.7370    0.0000 C   0  0  0  0  0  0  0  0  0  0  0  0
   -2.4144   -1.3245    0.0000 C   0  0  0  0  0  0  0  0  0  0  0  0
   -2.4144   -0.4995    0.0000 C   0  0  0  0  0  0  0  0  0  0  0  0
   -3.1288   -0.0870    0.0000 C   0  0  0  0  0  0  0  0  0  0  0  0
   -1.6999   -0.0870    0.0000 C   0  0  0  0  0  0  0  0  0  0  0  0
   -4.5578   -1.7370    0.0000 O   0  0  0  0  0  0  0  0  0  0  0  0
   -5.2722   -1.3245    0.0000 C   0  0  0  0  0  0  0  0  0  0  0  0
   -0.9462   -0.4226    0.0000 N   0  0  0  0  0  0  0  0  0  0  0  0
   -0.3942    0.1905    0.0000 C   0  0  0  0  0  0  0  0  0  0  0  0
   -0.8067    0.9050    0.0000 N   0  0  0  0  0  0  0  0  0  0  0  0
   -1.6137    0.7334    0.0000 N   0  0  0  0  0  0  0  0  0  0  0  0
   -0.7747   -1.2296    0.0000 C   0  0  0  0  0  0  0  0  0  0  0  0
    0.4263    0.1043    0.0000 S   0  0  0  0  0  0  0  0  0  0  0  0
   -0.4711    1.6587    0.0000 C   0  0  0  0  0  0  0  0  0  0  0  0
    0.3494    1.7449    0.0000 N   0  0  0  0  0  0  0  0  0  0  0  0
    0.8343    1.0774    0.0000 C   0  0  0  0  0  0  0  0  0  0  0  0
    1.6548    1.1637    0.0000 C   0  0  0  0  0  0  0  0  0  0  0  0
    1.9903    1.9174    0.0000 N   0  0  0  0  0  0  0  0  0  0  0  0
    1.5054    2.5848    0.0000 C   0  0  0  0  0  0  0  0  0  0  0  0
    0.6849    2.4986    0.0000 C   0  0  0  0  0  0  0  0  0  0  0  0
    2.8108    2.0036    0.0000 C   0  0  0  0  0  0  0  0  0  0  0  0
    3.2957    1.3362    0.0000 C   0  0  0  0  0  0  0  0  0  0  0  0
    4.1162    1.4224    0.0000 C   0  0  0  0  0  0  0  0  0  0  0  0
    4.4518    2.1761    0.0000 C   0  0  0  0  0  0  0  0  0  0  0  0
    3.9668    2.8435    0.0000 C   0  0  0  0  0  0  0  0  0  0  0  0
    3.1464    2.7573    0.0000 C   0  0  0  0  0  0  0  0  0  0  0  0
    5.2722    2.2623    0.0000 Br  0  0  0  0  0  0  0  0  0  0  0  0
   -1.3878   -1.7816    0.0000 C   0  0  0  0  0  0  0  0  0  0  0  0
   -1.2163   -2.5886    0.0000 C   0  0  0  0  0  0  0  0  0  0  0  0
   -0.4316   -2.8435    0.0000 C   0  0  0  0  0  0  0  0  0  0  0  0
    0.1815   -2.2915    0.0000 C   0  0  0  0  0  0  0  0  0  0  0  0
    0.0099   -1.4845    0.0000 C   0  0  0  0  0  0  0  0  0  0  0  0
    0.9661   -2.5464    0.0000 Cl  0  0  0  0  0  0  0  0  0  0  0  0
  1  2  2  0      
  2  3  1  0      
  3  4  2  0      
  4  5  1  0      
  5  6  2  0      
  6  1  1  0      
  5  7  1  0      
  2  8  1  0      
  8  9  1  0      
  7 10  1  0      
 10 11  1  0      
 11 12  1  0      
 12 13  1  0      
 13  7  2  0      
 10 14  1  0      
 11 15  2  0      
 12 16  1  0      
 16 17  1  0      
 17 18  1  0      
 18 19  1  0      
 19 20  1  0      
 20 21  1  0      
 21 22  1  0      
 22 17  1  0      
 20 23  1  0      
 23 24  2  0      
 24 25  1  0      
 25 26  2  0      
 26 27  1  0      
 27 28  2  0      
 28 23  1  0      
 26 29  1  0      
 14 30  2  0      
 30 31  1  0      
 31 32  2  0      
 32 33  1  0      
 33 34  2  0      
 34 14  1  0      
 33 35  1  0      
M  END
